# Supplementary material
Source: Research Square preprint supplement (doi:10.21203/rs.3.rs-9844268/v1)
Supplement: Supplementary file 1 [file 11707bc76e03f83ad48ba328.docx]

**Supplementary Table 5: Results of the linear regression models investigating the effects of PVS in the centrum semiovale on MDLC scores for (a) number of map views and (b) number of orientation stops.**

|  | **(a) Map views MDLC score** | | | **(b) Orientation stops MDLC score** | | | |
| --- | --- | --- | --- | --- | --- | --- | --- |
| Predictors | Estimate | 95% CI | *p*-value | Estimate | | 95% CI | *p*-value |
| (Intercept) | 0.839 | 0.800 ; 0.878 | **< .001** | 0.622 | 0.587 ; 0.657 | | **< .001** |
| Centrum semiovale PVS | -0.039 | -0.071 ; -0.006 | **.020** | -0.009 | -0.038 ; 0.020 | | .527 |
| Observations |  | 38 |  |  | 38 | |  |
| R2 / R2 adjusted |  | 0.141 / 0.118 |  |  | 0.011 / -0.016 | |  |
| AIC |  | -50.525 |  |  | -58.318 | |  |
