# Supplementary material
Source: Research Square preprint supplement (doi:10.21203/rs.3.rs-9844268/v1)
Supplement: Supplementary file 2 [file 254b8a6fa28f0e640d95cfdc.docx]

**Supplementary Table 2: Results of the mixed effect models estimating the fixed effects of session, age, sex, and environmental familiarity on five digital readouts of the “ExploreTrain” app.**

|  | **(a) Path deviation** | | | **(b) Wayfinding duration** | | | **(c) Movement speed** | | | **(d) Number of map views** | | | **(e) Number of orientation stops** | | |
| --- | --- | --- | --- | --- | --- | --- | --- | --- | --- | --- | --- | --- | --- | --- | --- |
| **Fixed effects** | | | | | | | | | | | | | | | |
|  | Est/β | 95% CI | p | Est/β | 95% CI | p | Est/β | 95% CI | p | Est/β | 95% CI | p | Est/β | 95% CI | p |
| (Intercept) | 1.188 | 1.058; 1.319 | **< .001** | 5.462 | 5.312; 5.613 | **< .001** | 1.371 | 1.267; 1.474 | **< .001** | 0.893 | 0.109; 1.678 | **.026** | 0.689 | 0.284; 1.093 | **< .001** |
| Session | -0.034 | -0.064; -0.003 | **.003** | -0.052 | -0.079; -0.025 | **< .001** | 0.021 | 0.007; 0.035 | **.004** | -0.395 | -0.537; -0.253 | **< .001** | -0.139 | -0.221; -0.058 | **< .001** |
| Age | 0.011 | 0.004; 0.018 | **.004** | 0.014 | 0.006; 0.021 | **.001** | -0.007 | -0.015;  -0.000 | *.056* | 0.007 | -0.048; 0.063 | .791 | 0.045 | 0.020; 0.070 | **< .001** |
| Sex (female) | 0.031 | -0.056; 0.117 | .491 | 0.103 | 0.008; 0.197 | **.041** | -0.093 | -0.181; -0.004 | **.048** | -0.507 | -1.187; 0.174 | .145 | 0.244 | -0.075; 0.563 | .133 |
| Environmental familiarity | -0.078 | -0.307; 0.151 | .507 | -0.078 | -0.331; 0.174 | .547 | -0.092 | -0.328; 0.145 | .452 | -1.733 | -3.569; 0.102 | .*064* | -0.567 | -1.427; 0.292 | .196 |
| **Random effects** | | | | | | | | | | | | | | | |
|  | Variance | | SD | Variance | | SD | Variance | | SD | Variance | | SD | Variance | | SD |
| Participant (intercept) | 0.020 | | 0.142 | 0.006 | | 0.077 | 0.011 | | 0.704 | 0.704 | | 0.839 | 0.054 | | 0.231 |
| Participant (slope) | 0.001 | | 0.034 | 0.001 | | 0.034 | 0.001 | | 0.092 | 0.092 | | 0.304 | 0.014 | | 0.118 |
| Track | 0.026 | | 0.161 | 0.192 | | 0.438 | 0.010 | | 0.167 | 0.167 | | 0.409 | 0.308 | | 0.555 |
| **Model fit** | | | | | | | | | | | | | | | |
| Delta AIC | -2.7 | | | -11.5 | | | -6.49 | | | -49.6 | | | -8.9 | | |
| (marginal / pseudo) R2 | 0.017 | | | 0.028 | | | 0.044 | | | 0.294 | | | 0.187 | | |

For all models, random intercepts were estimated per participant and track, while a random slope was estimated for each participant to account for interindividual learning differences across sessions. Model equations: digital readout ~ session + age + sex + environmental familiarity + (1 + session|participant) + (1|track). Digital readouts were the (a) path deviation, (b) log-transformed wayfinding duration, (c) movement speed, (d) number of map views, and (e) number of orientation stops. Linear mixed effect models (a-c) report marginal R2, whereas generalized mixed effect models (d-e) report pseudo R². Significant effects (p < .050) are marked in bold, trends (.050 < p < .100) are highlighted in italics.
