# Supplementary material
Source: Research Square preprint supplement (doi:10.21203/rs.3.rs-9844268/v1)
Supplement: Supplementary file 4 [file 2dd07b6a2f070166e87af902.docx]

**Supplementary Table 7: Results of the linear regression models investigating the effects of WMHs on MDLC scores for (a) number of map views and (b) number of orientation stops.**

|  | **(a) No of map views MDLC score** | | | **(b) No of orientation stops MDLC score** | | | |
| --- | --- | --- | --- | --- | --- | --- | --- |
| Predictors | Estimate | 95% CI | *p*-value | Estimate | | 95% CI | *p*-value |
| (Intercept) | 0.839 | 0.794 ; 0.884 | **< .001** | 0.605 | 0.571 ; 0.639 | | **< .001** |
| WMH | -0.008 | -0.065 ; -0.049 | .779 | -0.063 | -0.106 ; -0.020 | | **.005** |
| Observations |  | 38 |  |  | 38 | |  |
| R2 / R2 adjusted |  | 0.002 / -0.026 |  |  | 0.198 / 0.176 | |  |
| AIC |  | -44.819 |  |  | -66.271 | |  |
