# Supplementary material
Source: Research Square preprint supplement (doi:10.21203/rs.3.rs-9844268/v1)
Supplement: Supplementary file 5 [file 337bd50dc96245022476487c.docx]

**Supplementary Table 6: Results of the linear regression models investigating the effects of PVS in the basal ganglia on MDLC scores for (a) number of map views and (b) number of orientation stops.**

|  | **(a) Map views MDLC score** | | | **(b) Orientation stops MDLC score** | | | |
| --- | --- | --- | --- | --- | --- | --- | --- |
| Predictors | Estimate | 95% CI | *p*-value | Estimate | | 95% CI | *p*-value |
| (Intercept) | 0.842 | 0.800 ; 0.884 | **< .001** | 0.624 | 0.590 ; 0.659 | | **< .001** |
| Basal ganglia PVS | -0.003 | -0.044 ; 0.038 | .886 | -0.024 | -0.057 ; 0.010 | | .161 |
| Observations |  | 38 |  |  | 38 | |  |
| R2 / R2 adjusted |  | 0.001/ -0.027 |  |  | 0.054 / 0.028 | |  |
| AIC |  | -44.757 |  |  | -59.993 | |  |
