# Supplementary material
Source: Research Square preprint supplement (doi:10.21203/rs.3.rs-9844268/v1)
Supplement: Supplementary file 6 [file 47d620c19813c514598f9171.docx]

**Supplementary Table 4: Results of the linear regression model investigating the main effects of MTL tau, EC thickness, hippocampal VD, and the interaction between MTL tau and hippocampal VD, as well as the interaction between MTL tau and EC thickness on path deviation MDLC scores.**

|  |  | **Path deviation MDLC score** |  |
| --- | --- | --- | --- |
| Predictors | Est/β | 95% CI | *p*-value |
| (Intercept) | 0.738 | 0.715; 0.760 | **< .001** |
| MTL tau | -0.131 | -0.605; 0.342 | .570 |
| EC thickness | 0.045 | -0.191; 0.280 | .697 |
| Hippocampal VD | -0.040 | -0.081; 0.002 | *.058* |
| MTL tau x EC thickness | 3.536 | -0.359; 7.431 | *.073* |
| MTL tau x hippocampal VD | -0.767 | -1.532; -0.001 | **.050** |
| Observations |  | 27 |  |
| R2 / R2 adjusted |  | 0.515 / 0.399 |  |
| AIC |  | -74.605 |  |
