# Supplementary material
Source: Research Square preprint supplement (doi:10.21203/rs.3.rs-9844268/v1)
Supplement: Supplementary file 7 [file 735484f05be8d8d37d7bfc95.docx]

**Supplementary Table 1:** **Results of the linear mixed effect models estimating the interaction between session and group in (a) the VR-based pointing task, (b) map drawing test, and (c) the VWLT.**

|  | **(a) VR-based pointing task** | | | **(b) Map drawing** | | | | **(c) VWLT** | | | |
| --- | --- | --- | --- | --- | --- | --- | --- | --- | --- | --- | --- |
|  | Est/β | 95% CI | *p* | | Est/β | 95% CI | *p* | | Est/β | 95% CI | *p* | |
| (Intercept) | 75.812 | 59.304; 92.319 | **< .001** | | 0.037 | -0.032; 0.105 | .296 | | 88.082 | 78.964; 97.120 | **< .001** | |
| Session | 2.072 | -6.244; 10.389 | .627 | | 0.019 | 0.006; 0.032 | **.006** | | 2.600 | -4.743; 9.943 | .491 | |
| Group: training | 34.808 | 17.736; 51.880 | **< .001** | | 0.048 | -0.001; 0.098 | *.059* | | -2.077 | -11.582; 7.428 | .670 | |
| Session x group (training) | -29.100 | -39.370; -18.830 | **< .001** | | 0.096 | 0.079; 0.112 | **< .001** | | 4.637 | -4.435; 13.708 | .321 | |
| Age (centered) | 0.986 | 0.340; 1.633 | **.004** | | 0.000 | -0.004; 0.005 | .873 | | -0.269 | -1.017;0.480 | .485 | |
| Sex: female | 9.443 | 1.570; 17.316 | **.023** | | -0.013 | -0.064; 0.038 | .619 | | 5.523 | -3.3201; 14.248 | .220 | |
| Years of education (centered) | 0.180 | -1.509; 1.868 | .836 | | 0.003 | -0.008; 0.015 | .539 | | 1.751 | -0.205; 3.706 | *.085* | |
| Environmental familiarity | -38.479 | -57.128; -19.830 | **< .001** | | 0.972 | 0.851; 1.093 | **< .001** | | — | — | **—** | |
| **Random effects** | | | | | | | | | | | |
|  | Variance | SD |  | | Variance | SD |  | | Variance | SD |  | |
| Participant (intercept) | 517.7 | 22.75 |  | | 0.002 | 0.040 |  | | 162.9 | 12.76 |  | |
| Participant (slope) | 187.8 | 13.71 |  | | 0.000 | 0.021 |  | | — | — |  | |
| Landmark combination | 106.7 | 10.33 |  | | — | — |  | | — | — |  | |
| **Model fit** | | | | | | | | | | | |
| Delta AIC | -47 |  |  | |  | -135.890 |  | | -1.36 |  |  | |
| Marginal R2 | 0.089 |  |  | |  | 0.770 |  | | 0.081 |  |  | |
