# Supplementary material
Source: Research Square preprint supplement (doi:10.21203/rs.3.rs-9844268/v1)
Supplement: Supplementary file 8 [file bfc0c266d8c764f69593c8b6.docx]

**Supplementary Table 3: Multinomial logistic regression model investigating the predictive value of ADRD biomarkers on baseline navigation profiles.**

| Predictor | Profile (vs efficient navigators) | Est/β | SE | z-value | p-value |
| --- | --- | --- | --- | --- | --- |
| Intercept | Exploratory navigators | -0.652 | 0.657 | -0.993 | .321 |
| MTL tau | Exploratory navigators | -0.608 | 10.128 | -0.060 | .952 |
| EC thickness | Exploratory navigators | 4.578 | 6.256 | 0.732 | .464 |
| Hippocampal VD | Exploratory navigators | -1.143 | 0.895 | -1.277 | .202 |
| Centrum semiovale PVS | Exploratory navigators | 0.050 | 0.577 | 0.087 | .931 |
| Basal ganglia PVS | Exploratory navigators | 0.288 | 0.812 | 0.355 | .723 |
| WMH | Exploratory navigators | 0.360 | 1.016 | 0.354 | .723 |
| Intercept | Insecure navigators | -0.010 | 0.518 | -0.019 | .984 |
| MTL tau | Insecure navigators | -3.752 | 8.051 | -0.466 | .641 |
| EC thickness | Insecure navigators | 0.529 | 5.560 | 0.095 | .924 |
| Hippocampal VD | Insecure navigators | -0.354 | 0.700 | -0.505 | .613 |
| Centrum semiovale PVS | Insecure navigators | -0.022 | 0.521 | -0.042 | .967 |
| Basal ganglia PVS | Insecure navigators | -0.338 | 0.714 | -0.473 | .636 |
| WMH | Insecure navigators | 1.093 | 0.861 | 1.269 | .205 |
