# Supplementary material
Source: Research Square preprint supplement (doi:10.21203/rs.3.rs-9844268/v1)
Supplement: Supplementary file 9 [file cc3c8f229cf50dcfee2ddef2.docx]

**Supplementary Table 8:** **Results of the linear models estimating the effects of age, sex, and environmental familiarity on the five digital readouts used as inputs for MDLC and LPA calculation.**

|  | **(a) Path deviation** | | | **(b) Wayfinding duration** | | | **(c) Movement speed** | | | **(d) Number of map views** | | | **(e) Number of orientation stops** | | |
| --- | --- | --- | --- | --- | --- | --- | --- | --- | --- | --- | --- | --- | --- | --- | --- |
|  | Est/β | 95% CI | p | Est/β | 95% CI | p | Est/β | 95% CI | p | Est/β | 95% CI | p | Est/β | 95% CI | p |
| (Intercept) | 1.219 | 1.123; 1.315 | **< .001** | 228.037 | 146.037; 310.037 | **< .001** | 1.442 | 1.324; 1.559 | **< .001** | 3.368 | 2.116; 4.620 | **< .001** | 3.436 | 1.902; 4.969 | **< .001** |
| Age | 0.015 | 0.008; 0.022 | **<** **.001** | 3.811 | 2.508; 5.115 | **< .001** | -0.008 | -0.010;  -0.006 | **< .001** | 0.005 | -0.015; 0.025 | .619 | 0.067 | 0.042; 0.091 | **< .001** |
| Sex (female) | 0.043 | -0.044; 0.130 | .335 | 15.553 | -0.435; 31.540 | *.057* | -0.093 | -0.103; -0.057 | **< .001** | -0.586 | -0.830; -0.342 | ***<* .001** | -0.058 | -0.357; 0.241 | .702 |
| Environmental familiarity | -0.102 | -0.334; 0.123 | .387 | -5.707 | -48.196; 36.781 | .792 | -0.092 | -0.159; -0.037 | **.002** | -2.448 | -3.097; -1.800 | **< .001** | -0.810 | -1.605; -0.016 | **.046** |
| Track* |  |  |  | 113.989 | - | **< .001** | 0.111 | - | **< .001** | 0.697 | - | **< .001** | 1.712 |  | **< .001** |
| **Model fit** | | | | | | | | | | | | | | | |
| R2 | 0.008 | | | 0.223 | | | 0.179 | | | 0.052 | | | 0.101 | | |

Model equation: digital readout ~ age + sex + environmental familiarity + track. Digital readouts included: (a) path deviation, (b) log-transformed wayfinding duration, (c) movement speed, (d) number of map views, and (e) number of orientation stops. Adjusted R² values are reported for each model (a-e). Significant effects (p < .050) are marked in bold, trends (.050 < p < .100) are highlighted in italics.*Track: Owing to the high number of factor levels (n = 96), individual coefficient estimates, confidence intervals, and p-values for each level are not reported. Instead, the standard deviation of the track coefficients is shown. The associated p-value reflects the main effect of track from an ANOVA, without post hoc comparisons. For the path deviation model, track was excluded as a fixed effect, as this variable is already normalized by path length based on OpenStreetMap optimal wayfinding distance.
